# Supplementary material for: Identification of a Novel Mutation Exacerbated the PSI Photoinhibition in pgr5/pgrl1 Mutants; Caution for Overestimation of the Phenotypes in Arabidopsis pgr5-1 Mutant
Source: MDPI journal article supplement (doi:10.3390/cells10112884), 2021-10-26
Supplement: s1 [file s1]

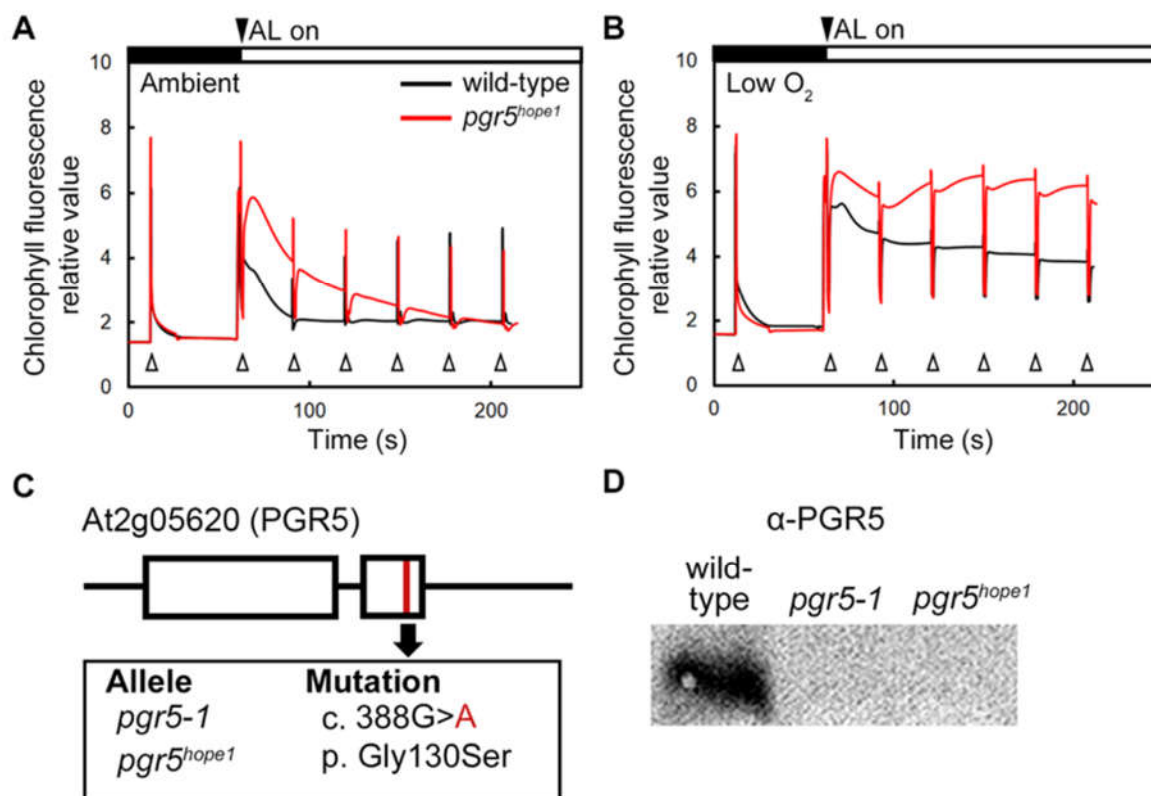

Supplementary Figure S1: *pgr5<sup>hope1</sup>* screening method and mutation identification.

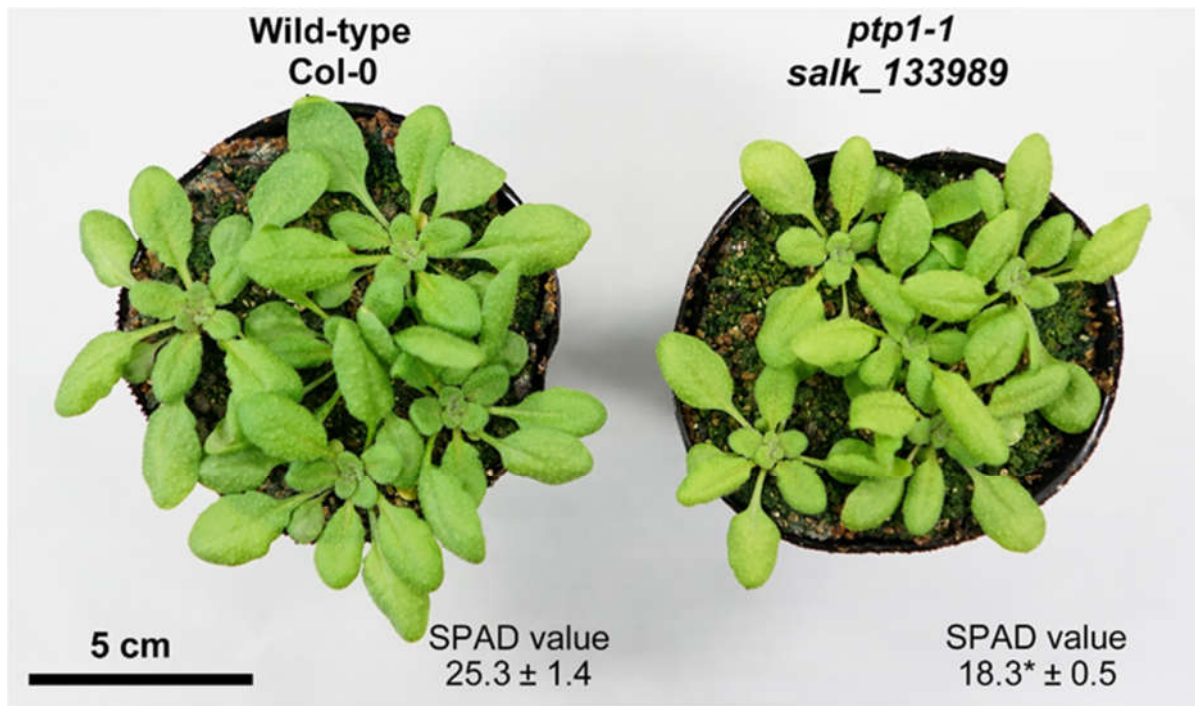

Supplementary Figure S2: The growth phenotype of *ptp1-1* (*salk\_133989*) mutant.

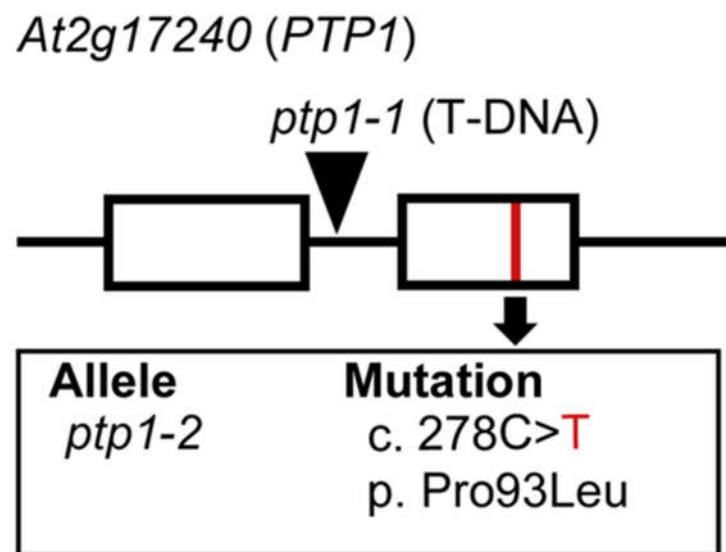

Supplementary Figure S3: The *PTP1* mutations in *ptp1-1* and *pgr5-1*.

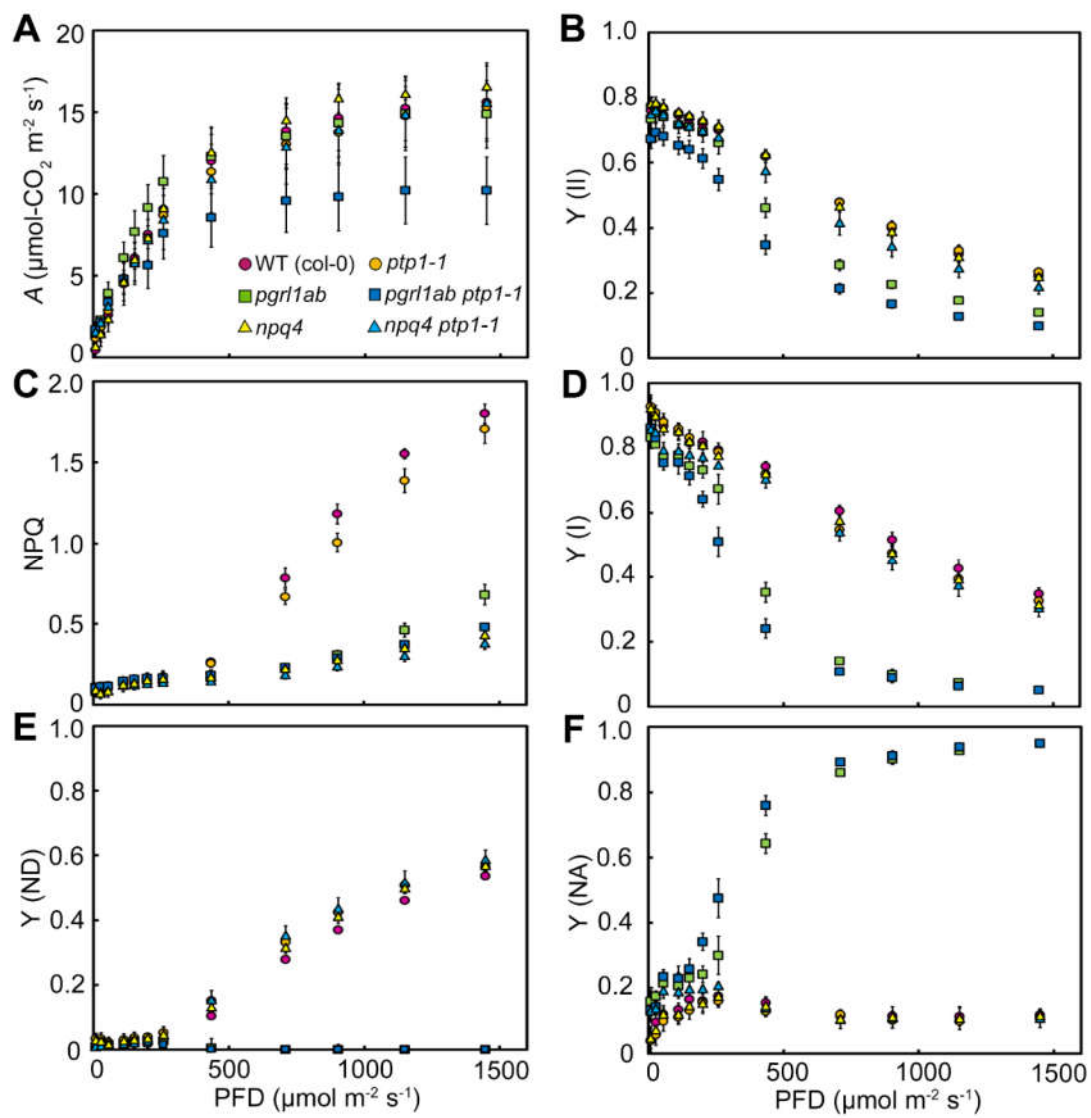Supplementary Figure S4: The photosynthesis capacity of *pgr1ab* and *pgr1ab ptp1* mutants.

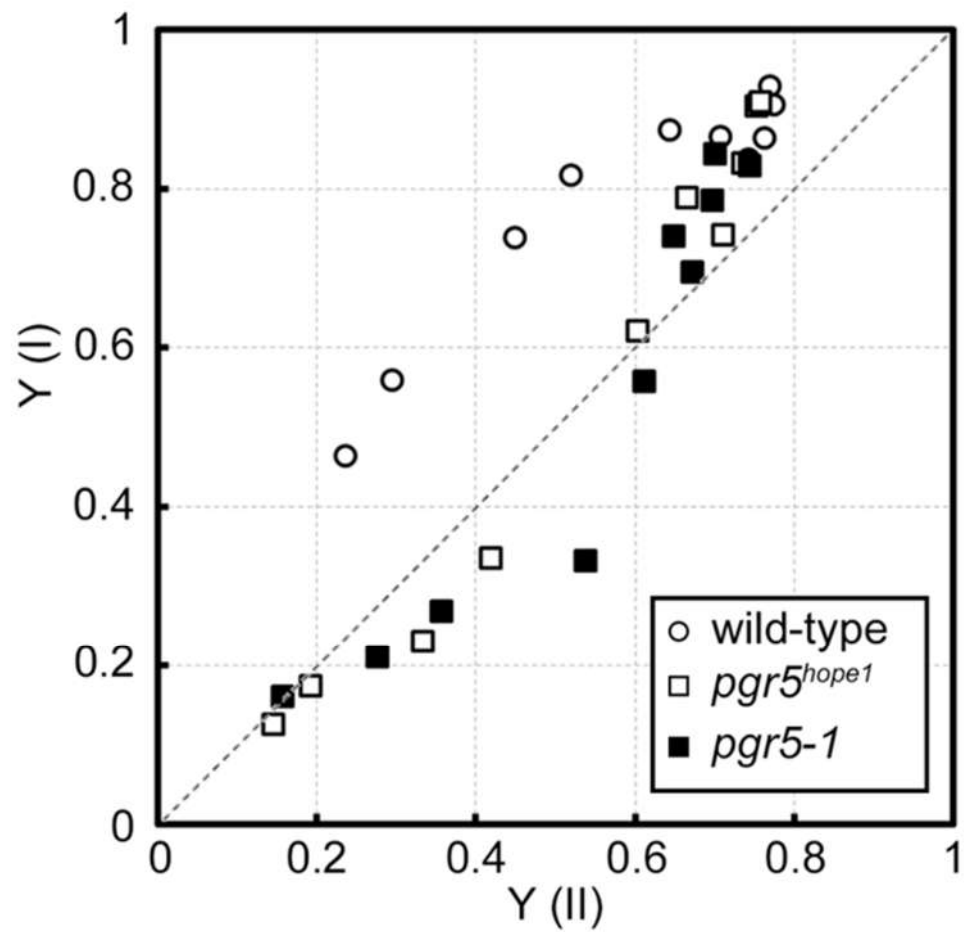

Supplementary Figure S5: The extent of photoinhibition in PSII and PSI by constant intense light using *pgr1ab* and *pgr1ab ptp1* mutants.

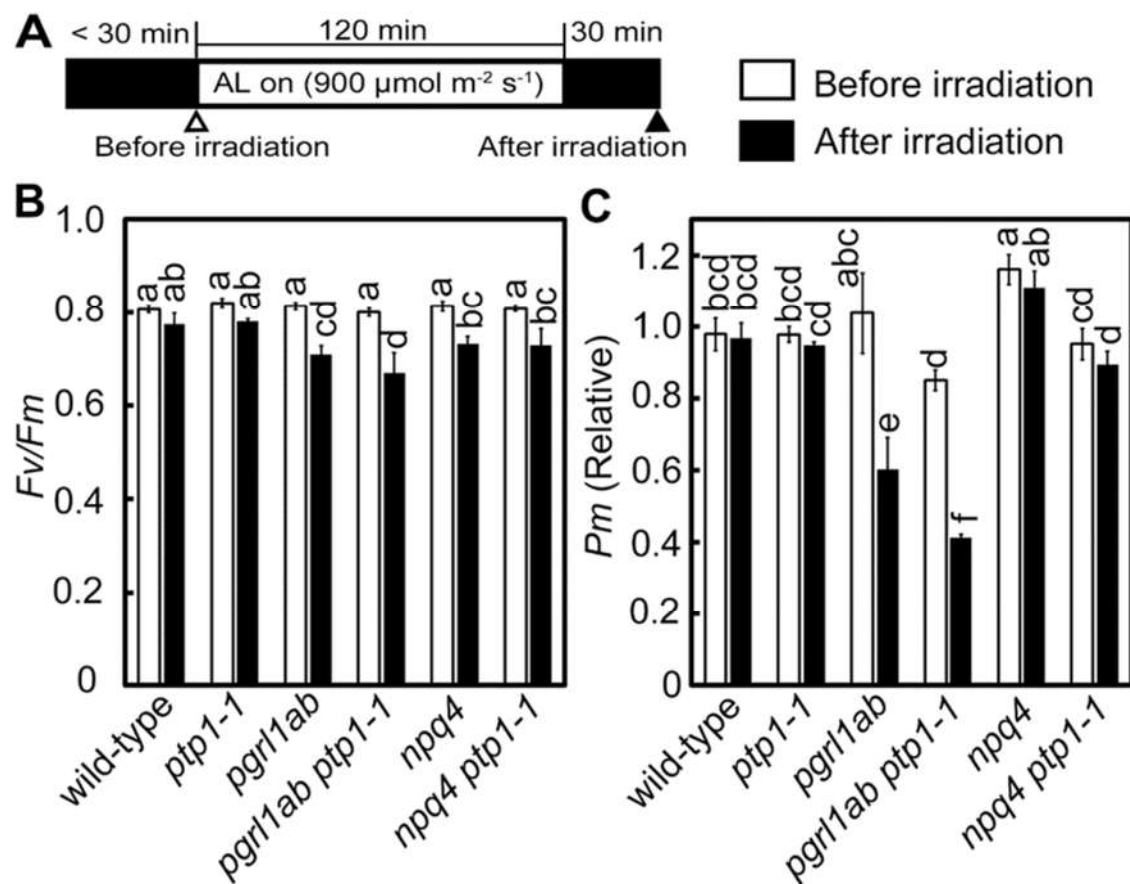

Supplementary Figure S6: The relationship between Y(II) and Y(I) in wild-type, *pgr5<sup>hope1</sup>* and *pgr5-1*.

Supplementary Table S2: Primer information used in this study.

| Primer                                 | Primer sequence           |                                                                                     |
|----------------------------------------|---------------------------|-------------------------------------------------------------------------------------|
| SALK_133989_LP                         | GAAGGTTCTGAATTCGAAAGG     | Specific primers for selection of <i>SALK_133989</i> mutant                         |
| SALK_133989_RP                         | ACTATCAAAACGCAACGCAG      |                                                                                     |
| Forward primer for <i>pgr5</i> cloning | CACCATGGCTGCTGCTTCGATTCTG | Specific primers for <i>pgr5</i> cDNA cloning and insertion into D-TOPO entry clone |
| Reverse primer for <i>pgr5</i> cloning | CTAAGCAAGGAAACCAAGCCTC    |                                                                                     |
| Forward primer for <i>ptp1</i> cloning | CACCATGGCGTCGCTTTGCTCTGC  | Specific primers for <i>ptp1</i> cDNA cloning and insertion into D-TOPO entry clone |
| Reverse primer for <i>ptp1</i> cloning | CTATTGCTGCTTCTCGGGTTGTTT  |                                                                                     |

Supplementary Table S2: The relative amount of PGR5 protein in each mutant (per chlorophyll) The PGR5 protein was relatively quantified based on the results of immunoblotting. Each number shows the relative value when the wild-type (Col-0) is 1.0. Values are means  $\pm$  SD. ( $n = 3$ ) n.d. indicates not detectable.

| genotype                              | Relative amount of PGR5 protein per chlorophyll |
|---------------------------------------|-------------------------------------------------|
| <b>Wild-type</b>                      |                                                 |
| Col-0                                 | 1.0 $\pm$ 0.2                                   |
| gl-1                                  | 1.0 $\pm$ 0.2                                   |
| <b>mutants</b>                        |                                                 |
| <i>pgr5-1</i><br>(gl-1)               | n.d.                                            |
| <i>pgr5<sup>hope1</sup></i><br>(gl-1) | n.d.                                            |
| <i>ptp1-1</i><br>(Col-0)              | 1.4 $\pm$ 0.2                                   |
| <i>pgr5-1 PGR5</i>                    | 2.9 $\pm$ 0.6                                   |
| <i>pgr5<sup>hope1</sup> PGR5</i>      | 2.7 $\pm$ 0.5                                   |
| <i>pgr1lab</i><br>(Col-0)             | n.d.                                            |
| <i>pgr1lab ptp1-1</i><br>(Col-0)      | n.d.                                            |
