# Supplementary material for: Identification of a Novel Mutation Exacerbated the PSI Photoinhibition in pgr5/pgrl1 Mutants; Caution for Overestimation of the Phenotypes in Arabidopsis pgr5-1 Mutant
Source: Cells. 2021 Oct 26;10(11):2884. doi: 10.3390/cells10112884 (PMC8616342; doi:10.3390/cells10112884)
Supplement: Supplementary file 1 [file cells-10-02884-s001.zip › Supplementary table S3_wada_etal.xlsx]

## Sheet: Sheet1
Supplementary Table. S3 Homozygous genomic mutations in the cDNA region on chromosome 2, detected by whole-genome resequencing analysis of pgr5hope1, pgr5-1, and wild-type gl-1.
*In the column of Pos, the mutations identified in the different lines were distinguished by colors in the column shown below.
		pgr5hope1 only			gl-1 and pgr5hope1				pgr5-1 only			gl-1 and pgr5-1
Chromosome	Pos	Ref	Alt	Quality	Hom/Het	Read Depth	Alt Depth	Gene Name	Gene ID	Start	End	Strand	Represented Transcript (Annotation_type ; Gene_name ; codon_change ; protein_change ; cDNA_position/cDNA_len ; CDS_position/CDS_len ; Protein_position/Protein_len)	Transcript1 (Annotation_type ; Gene_name ; codon_change ; protein_change ; cDNA_position/cDNA_len ; CDS_position/CDS_len ; Protein_position/Protein_len)	Transcript2 (Annotation_type ; Gene_name ; codon_change ; protein_change ; cDNA_position/cDNA_len ; CDS_position/CDS_len ; Protein_position/Protein_len)	Transcript3 (Annotation_type ; Gene_name ; codon_change ; protein_change ; cDNA_position/cDNA_len ; CDS_position/CDS_len ; Protein_position/Protein_len)	Transcript4 (Annotation_type ; Gene_name ; codon_change ; protein_change ; cDNA_position/cDNA_len ; CDS_position/CDS_len ; Protein_position/Protein_len)	Transcript5 (Annotation_type ; Gene_name ; codon_change ; protein_change ; cDNA_position/cDNA_len ; CDS_position/CDS_len ; Protein_position/Protein_len)
CP002685.1	2019	T	C	76	hom	984	956	AT2G01008	gene-AT2G01008	1025	3173	+	missense_variant ; AT2G01008 ; protein_coding ; 3/3 ; c.448T>C ; p.Ser150Pro ; 448/1602 ;	missense_variant ; AT2G01008 ; protein_coding ; 3/3 ; c.448T>C ; p.Ser150Pro ; 448/1602 ;	upstream_gene_variant ; AT2G03855 ; pseudogene ; . ; n.-786T>C ; . ; . ;	upstream_gene_variant ; AT2G01010 ; pseudogene ; . ; n.-1687T>C ; . ; . ;	upstream_gene_variant ; AT2G01020 ; pseudogene ; . ; n.-3763T>C ; . ; . ;	upstream_gene_variant ; AT2G01021 ; protein_coding ; . ; c.-4552T>C ; . ; . ;
CP002685.1	3615212	A	G	68	hom	477	411	AT2G07981	gene-AT2G07981	3614986	3617716	+	missense_variant&splice_region_variant ; AT2G07981 ; protein_coding ; 2/16 ; c.118A>G ; p.Asn40Asp ; 118/1242 ;	missense_variant&splice_region_variant ; AT2G07981 ; protein_coding ; 2/16 ; c.118A>G ; p.Asn40Asp ; 118/1242 ;	upstream_gene_variant ; AT2G08986 ; protein_coding ; . ; c.-2846A>G ; . ; . ;
CP002685.1	8845491	G	A	225	hom	15	15	MEF21	gene-AT2G20540	8844079	8846095	+	.	missense_variant ; AT2G20540 ; protein_coding ; 1/1 ; c.1332G>A ; p.Met444Ile ; 1341/1614 ;	missense_variant ; AT2G20540 ; protein_coding ; 2/2 ; c.1242G>A ; p.Met414Ile ; 1333/1937 ;	upstream_gene_variant ; AT2G20555 ; n.-1954G>A ; . ; . ; . ; . ;	downstream_gene_variant ; AT2G20520 ; protein_coding ; . ; c.*4085G>A ; . ; . ;	downstream_gene_variant ; AT2G20530 ; protein_coding ; . ; c.*1704G>A ; . ; . ;
CP002685.1	8880364	gaaaaaaaaaaa	gaaaaaaaaaa	36.4154	hom	13	13	SUR1	gene-AT2G20610	8877887	8880440	-	.	5_prime_UTR_variant ; AT2G20610 ; protein_coding ; 1/7 ; c.-77delT ; . ; . ;	5_prime_UTR_variant ; AT2G20610 ; protein_coding ; 1/6 ; c.-77delT ; . ; . ;	downstream_gene_variant ; AT2G20605 ; protein_coding ; . ; c.*3509delA ; . ; . ;
CP002685.1	10506160	gttttttttttttttt	gTttttttttttttttt	31.2109	hom	20	19	AT2G24693	gene-AT2G24693	10506024	10506859	+	intron_variant ; AT2G24693 ; protein_coding ; 1/2 ; c.-35+74_-35+75insT ; . ; . ;	upstream_gene_variant ; AT2G24690 ; protein_coding ; . ; c.-3066_-3065insA ; . ; . ;	upstream_gene_variant ; AT2G24690 ; protein_coding ; . ; c.-3066_-3065insA ; . ; . ;	downstream_gene_variant ; AT2G24692 ; protein_coding ; . ; c.*2201_*2202insT ; . ; . ;	downstream_gene_variant ; AT2G24696 ; protein_coding ; . ; c.*2892_*2893insA ; . ; . ;	intron_variant ; AT2G24693 ; protein_coding ; 1/2 ; c.-35+74_-35+75insT ; . ; . ;
CP002685.1	3622154	G	T	33.5178	hom	253	231	AT2G08986	gene-AT2G08986	3618058	3626460	+	missense_variant ; AT2G08986 ; protein_coding ; 22/46 ; c.1815G>T ; p.Leu605Phe ; 1815/3657 ;	missense_variant ; AT2G08986 ; protein_coding ; 22/46 ; c.1815G>T ; p.Leu605Phe ; 1815/3657 ;	downstream_gene_variant ; AT2G07981 ; protein_coding ; . ; c.*4438G>T ; . ; . ;
CP002685.1	3625760	t	tC	84	hom	230	196	AT2G08986	gene-AT2G08986	3618058	3626460	+	intron_variant ; AT2G08986 ; protein_coding ; 42/45 ; c.3322+16_3322+17insC ; . ; . ;	intron_variant ; AT2G08986 ; protein_coding ; 42/45 ; c.3322+16_3322+17insC ; . ; . ;
CP002685.1	10418201	CCT	CCTCT	225	hom	14	14	HA5	gene-AT2G24520	10414963	10420029	+	.	splice_region_variant&intron_variant ; AT2G24520 ; protein_coding ; 9/15 ; c.2074-7_2074-6insCT ; . ; . ;	splice_region_variant&intron_variant ; AT2G24520 ; protein_coding ; 8/14 ; c.1885-7_1885-6insCT ; . ; . ;	splice_region_variant&intron_variant ; AT2G24520 ; protein_coding ; 7/13 ; c.1885-7_1885-6insCT ; . ; . ;	splice_region_variant&intron_variant ; AT2G24520 ; protein_coding ; 5/11 ; c.1156-7_1156-6insCT ; . ; . ;	upstream_gene_variant ; AT2G00780 ; n.-4947_-4946insAG ; . ; . ; . ; . ;
CP002685.1	3624537	G	A	70	hom	543	478	AT2G08986	gene-AT2G08986	3618058	3626460	+	intron_variant ; AT2G08986 ; protein_coding ; 35/45 ; c.2744-21G>A ; . ; . ;	intron_variant ; AT2G08986 ; protein_coding ; 35/45 ; c.2744-21G>A ; . ; . ;
CP002685.1	6928058	C	T	225	hom	30	30	AT2G15900	gene-AT2G15900	6927024	6932791	+	missense_variant ; AT2G15900 ; protein_coding ; 2/15 ; c.401C>T ; p.Pro134Leu ; 767/3607 ;	missense_variant ; AT2G15900 ; protein_coding ; 2/15 ; c.401C>T ; p.Pro134Leu ; 767/3607 ;	upstream_gene_variant ; AT2G06515 ; pseudogene ; . ; n.-1334G>A ; . ; . ;	downstream_gene_variant ; AT2G15910 ; protein_coding ; . ; c.*4859G>A ; . ; . ;
CP002685.1	6972272	C	T	228	hom	29	27	AT2G16018	gene-AT2G16018	6972222	6973705	-	3_prime_UTR_variant ; AT2G16018 ; protein_coding ; 2/2 ; c.*307G>A ; . ; . ;	3_prime_UTR_variant ; AT2G16018 ; protein_coding ; 2/2 ; c.*307G>A ; . ; . ;	upstream_gene_variant ; AT2G16016 ; protein_coding ; . ; c.-1004G>A ; . ; . ;	upstream_gene_variant ; AT2G16019 ; protein_coding ; . ; c.-900C>T ; . ; . ;	upstream_gene_variant ; AT2G16020 ; protein_coding ; . ; c.-1084C>T ; . ; . ;	upstream_gene_variant ; AT2G16040 ; protein_coding ; . ; c.-3745C>T ; . ; . ;
CP002685.1	7324807	C	T	228	hom	27	26	AT2G16900	gene-AT2G16900	7323570	7326317	-	missense_variant ; AT2G16900 ; protein_coding ; 3/4 ; c.347G>A ; p.Gly116Asp ; 816/1860 ; | missense_variant ; AT2G16900 ; protein_coding ; 2/3 ; c.80G>A ; p.Gly27Asp ; 941/2030 ; | missense_variant ; AT2G16900 ; protein_coding ; 2/3 ; c.347G>A ; p.Gly116Asp ; 859/1932 ; | missense_variant ; AT2G16900 ; protein_coding ; 3/4 ; c.347G>A ; p.Gly116Asp ; 1208/2252 ; | missense_variant ; AT2G16900 ; p…	missense_variant ; AT2G16900 ; protein_coding ; 3/4 ; c.347G>A ; p.Gly116Asp ; 816/1860 ;	missense_variant ; AT2G16900 ; protein_coding ; 2/3 ; c.80G>A ; p.Gly27Asp ; 941/2030 ;	missense_variant ; AT2G16900 ; protein_coding ; 2/3 ; c.347G>A ; p.Gly116Asp ; 859/1932 ;	missense_variant ; AT2G16900 ; protein_coding ; 3/4 ; c.347G>A ; p.Gly116Asp ; 1208/2252 ;	missense_variant ; AT2G16900 ; protein_coding ; 3/4 ; c.80G>A ; p.Gly27Asp ; 946/1990 ;
CP002685.1	7338015	C	T	228	hom	21	20	UBC23	gene-AT2G16920	7334226	7339350	-	.	synonymous_variant ; AT2G16920 ; protein_coding ; 2/8 ; c.813G>A ; p.Arg271Arg ; 1019/3848 ;	synonymous_variant ; AT2G16920 ; protein_coding ; 2/8 ; c.813G>A ; p.Arg271Arg ; 1030/3526 ;	upstream_gene_variant ; AT2G06795 ; pseudogene ; . ; n.-4205G>A ; . ; . ;	upstream_gene_variant ; AT2G16930 ; protein_coding ; . ; c.-3477C>T ; . ; . ;	upstream_gene_variant ; AT2G16930 ; protein_coding ; . ; c.-3477C>T ; . ; . ;
CP002685.1	7379164	C	T	225	hom	37	37	AT2G16980	gene-AT2G16980	7376199	7381165	+	splice_region_variant&intron_variant ; AT2G16980 ; protein_coding ; 6/12 ; c.889-3C>T ; . ; . ; | splice_region_variant&intron_variant ; AT2G16980 ; protein_coding ; 6/13 ; c.889-3C>T ; . ; . ; | splice_region_variant&intron_variant ; AT2G16980 ; protein_coding ; 6/12 ; c.889-3C>T ; . ; . ; | splice_region_variant&intron_variant ; AT2G16980 ; protein_coding ; 6/11 ; c.889-3C>T ; . ; . ; | splice_…	splice_region_variant&intron_variant ; AT2G16980 ; protein_coding ; 6/12 ; c.889-3C>T ; . ; . ;	splice_region_variant&intron_variant ; AT2G16980 ; protein_coding ; 6/13 ; c.889-3C>T ; . ; . ;	splice_region_variant&intron_variant ; AT2G16980 ; protein_coding ; 6/12 ; c.889-3C>T ; . ; . ;	splice_region_variant&intron_variant ; AT2G16980 ; protein_coding ; 6/11 ; c.889-3C>T ; . ; . ;	splice_region_variant&intron_variant ; AT2G16980 ; protein_coding ; 6/13 ; c.844-3C>T ; . ; . ;
CP002685.1	7498851	C	T	228	hom	27	26	AT2G17240	gene-AT2G17240	7498101	7499331	+	missense_variant ; AT2G17240 ; protein_coding ; 2/2 ; c.278C>T ; p.Pro93Leu ; 355/835 ;	missense_variant ; AT2G17240 ; protein_coding ; 2/2 ; c.278C>T ; p.Pro93Leu ; 355/835 ;	upstream_gene_variant ; AT2G17230 ; protein_coding ; . ; c.-2868G>A ; . ; . ;	upstream_gene_variant ; AT2G17250 ; protein_coding ; . ; c.-722C>T ; . ; . ;
CP002685.1	8991034	C	T	225	hom	24	24	DGK5|AT2G07355	gene-AT2G20900|gene-AT2G07355	8989275|8990844	8993275|8991189	-|+	non_coding_transcript_exon_variant ; AT2G07355 ; pseudogene ; 1/1 ; n.191C>T ; . ; . ;	upstream_gene_variant ; AT2G07345 ; pseudogene ; . ; n.-2189G>A ; . ; . ;	downstream_gene_variant ; AT2G20880 ; protein_coding ; . ; c.*3971C>T ; . ; . ;	downstream_gene_variant ; AT2G20890 ; protein_coding ; . ; c.*1849C>T ; . ; . ;	downstream_gene_variant ; AT2G20910 ; n.*3112G>A ; . ; . ; . ; . ;	intron_variant ; AT2G20900 ; protein_coding ; 8/12 ; c.866+217G>A ; . ; . ;
CP002685.1	9257131	C	T	228	hom	29	27	AT2G00720|AT2G07435	gene-AT2G00720|gene-AT2G07435	9256705|9257096	9258267|9257415	-|+	non_coding_transcript_exon_variant ; AT2G00720 ; n.820G>A ; . ; . ; . ; . ; | non_coding_transcript_exon_variant ; AT2G00720 ; n.510G>A ; . ; . ; . ; . ; | non_coding_transcript_exon_variant ; AT2G00720 ; n.390G>A ; . ; . ; . ; . ; | non_coding_transcript_exon_variant ; AT2G00720 ; n.590G>A ; . ; . ; . ; . ; | non_coding_transcript_exon_variant ; AT2G00720 ; n.601G>A ; . ; . ; . ; . ; | non_codin…	upstream_gene_variant ; AT2G21650 ; protein_coding ; . ; c.-2523C>T ; . ; . ;	downstream_gene_variant ; AT2G21630 ; protein_coding ; . ; c.*3302C>T ; . ; . ;	downstream_gene_variant ; AT2G21640 ; protein_coding ; . ; c.*1678C>T ; . ; . ;	downstream_gene_variant ; AT2G07445 ; pseudogene ; . ; n.*1585G>A ; . ; . ;	non_coding_transcript_exon_variant ; AT2G00720 ; n.820G>A ; . ; . ; . ; . ;
CP002685.1	9755524	C	T	228	hom	31	30	SCPL12	gene-AT2G22920	9753631	9757600	+	.	splice_region_variant&synonymous_variant ; AT2G22920 ; protein_coding ; 7/14 ; c.615C>T ; p.Gly205Gly ; 812/1685 ;	splice_region_variant&synonymous_variant ; AT2G22920 ; protein_coding ; 4/11 ; c.78C>T ; p.Gly26Gly ; 189/1062 ;	splice_region_variant&synonymous_variant ; AT2G22920 ; protein_coding ; 7/13 ; c.615C>T ; p.Gly205Gly ; 695/1443 ;	splice_region_variant&synonymous_variant ; AT2G22920 ; protein_coding ; 7/14 ; c.615C>T ; p.Gly205Gly ; 615/1510 ;	upstream_gene_variant ; AT2G22930 ; protein_coding ; . ; c.-4242C>T ; . ; . ;
CP002685.1	10418199	TCCC	TCCCCC	197	hom	28	28	HA5	gene-AT2G24520	10414963	10420029	+	.	splice_region_variant&intron_variant ; AT2G24520 ; protein_coding ; 9/15 ; c.2074-8_2074-7insCC ; . ; . ;	splice_region_variant&intron_variant ; AT2G24520 ; protein_coding ; 8/14 ; c.1885-8_1885-7insCC ; . ; . ;	splice_region_variant&intron_variant ; AT2G24520 ; protein_coding ; 7/13 ; c.1885-8_1885-7insCC ; . ; . ;	splice_region_variant&intron_variant ; AT2G24520 ; protein_coding ; 5/11 ; c.1156-8_1156-7insCC ; . ; . ;	upstream_gene_variant ; AT2G00780 ; n.-4946_-4945insGG ; . ; . ; . ; . ;
CP002685.1	12458783	A	G	225	hom	18	18	AT2G28990	gene-AT2G28990	12454637	12459726	+	intron_variant ; AT2G28990 ; protein_coding ; 12/13 ; c.2056+76A>G ; . ; . ; | intron_variant ; AT2G28990 ; protein_coding ; 11/12 ; c.2056+76A>G ; . ; . ;	upstream_gene_variant ; AT2G28980 ; pseudogene ; . ; n.-4427T>C ; . ; . ;	upstream_gene_variant ; AT2G08310 ; pseudogene ; . ; n.-3944T>C ; . ; . ;	upstream_gene_variant ; AT2G29000 ; protein_coding ; . ; c.-1998A>G ; . ; . ;	intron_variant ; AT2G28990 ; protein_coding ; 12/13 ; c.2056+76A>G ; . ; . ;	intron_variant ; AT2G28990 ; protein_coding ; 11/12 ; c.2056+76A>G ; . ; . ;
CP002685.1	16076291	a	aT	62	hom	10	9	AT2G38380	gene-AT2G38380	16076289	16078781	+	5_prime_UTR_variant ; AT2G38380 ; protein_coding ; 1/4 ; c.-152_-151insT ; . ; . ;	5_prime_UTR_variant ; AT2G38380 ; protein_coding ; 1/4 ; c.-152_-151insT ; . ; . ;	upstream_gene_variant ; AT2G38370 ; protein_coding ; . ; c.-1540_-1539insA ; . ; . ;	upstream_gene_variant ; AT2G38390 ; protein_coding ; . ; c.-3435_-3434insT ; . ; . ;	upstream_gene_variant ; AT2G38370 ; protein_coding ; . ; c.-2124_-2123insA ; . ; . ;	downstream_gene_variant ; AT2G38365 ; protein_coding ; . ; c.*5041_*5042insT ; . ; . ;
CP002685.1	17337451	ctttttttttttt	cTtttttttttttt	44.258	hom	26	25	ACA4	gene-AT2G41560	17332050	17337492	-	.	5_prime_UTR_variant ; AT2G41560 ; protein_coding ; 1/7 ; c.-285_-284insA ; . ; . ;	upstream_gene_variant ; AT2G41570 ; pseudogene ; . ; n.-274dupT ; . ; . ;	upstream_gene_variant ; AT2G41580 ; pseudogene ; . ; n.-2341dupT ; . ; . ;	upstream_gene_variant ; AT2G41560 ; protein_coding ; . ; c.-2073_-2072insA ; . ; . ;	upstream_gene_variant ; AT2G41560 ; protein_coding ; . ; c.-2073_-2072insA ; . ; . ;
CP002685.1	3618380	G	T	56	hom	1890	1680	AT2G08986	gene-AT2G08986	3618058	3626460	+	intron_variant ; AT2G08986 ; protein_coding ; 2/45 ; c.110-13G>T ; . ; . ;	downstream_gene_variant ; AT2G07981 ; protein_coding ; . ; c.*664G>T ; . ; . ;	intron_variant ; AT2G08986 ; protein_coding ; 2/45 ; c.110-13G>T ; . ; . ;
CP002685.1	3620695	A	G	109	hom	815	686	AT2G08986	gene-AT2G08986	3618058	3626460	+	synonymous_variant ; AT2G08986 ; protein_coding ; 14/46 ; c.1089A>G ; p.Leu363Leu ; 1089/3657 ;	synonymous_variant ; AT2G08986 ; protein_coding ; 14/46 ; c.1089A>G ; p.Leu363Leu ; 1089/3657 ;	downstream_gene_variant ; AT2G07981 ; protein_coding ; . ; c.*2979A>G ; . ; . ;
CP002685.1	7478896	C	T	225	hom	27	27	AT2G17190	gene-AT2G17190	7477845	7481690	-	intron_variant ; AT2G17190 ; protein_coding ; 5/8 ; c.1350-131G>A ; . ; . ;	upstream_gene_variant ; AT2G17180 ; protein_coding ; . ; c.-1249G>A ; . ; . ;	downstream_gene_variant ; AT2G17160 ; protein_coding ; . ; c.*4884C>T ; . ; . ;	downstream_gene_variant ; AT2G17170 ; protein_coding ; . ; c.*2458C>T ; . ; . ;	downstream_gene_variant ; AT2G17200 ; protein_coding ; . ; c.*3237G>A ; . ; . ;	intron_variant ; AT2G17190 ; protein_coding ; 5/8 ; c.1350-131G>A ; . ; . ;
CP002685.1	7787172	C	T	225	hom	28	28	AT2G17930	gene-AT2G17930	7784288	7802604	-	missense_variant ; AT2G17930 ; protein_coding ; 29/35 ; c.9416G>A ; p.Arg3139Lys ; 9790/12118 ;	missense_variant ; AT2G17930 ; protein_coding ; 29/35 ; c.9416G>A ; p.Arg3139Lys ; 9790/12118 ;	downstream_gene_variant ; AT2G17910 ; pseudogene ; . ; n.*4643C>T ; . ; . ;	downstream_gene_variant ; AT2G17920 ; protein_coding ; . ; c.*3441C>T ; . ; . ;
CP002685.1	7877703	C	T	225	hom	26	26	SRS4	gene-AT2G18120	7876544	7878072	-	.	5_prime_UTR_variant ; AT2G18120 ; protein_coding ; 1/2 ; c.-22G>A ; . ; . ;	5_prime_UTR_variant ; AT2G18120 ; protein_coding ; 1/2 ; c.-22G>A ; . ; . ;	downstream_gene_variant ; AT2G18110 ; protein_coding ; . ; c.*3990C>T ; . ; . ;	downstream_gene_variant ; AT2G18115 ; n.*2676C>T ; . ; . ; . ; . ;	downstream_gene_variant ; AT2G18130 ; protein_coding ; . ; c.*1605G>A ; . ; . ;
CP002685.1	7946335	C	T	225	hom	36	36	TLP2|AT2G18270	gene-AT2G18280|gene-AT2G18270	7945998|7946158	7948468|7946406	+|-	synonymous_variant ; AT2G18270 ; protein_coding ; 1/1 ; c.72G>A ; p.Gln24Gln ; 72/249 ;	synonymous_variant ; AT2G18270 ; protein_coding ; 1/1 ; c.72G>A ; p.Gln24Gln ; 72/249 ;	5_prime_UTR_premature_start_codon_gain_variant ; AT2G18280 ; protein_coding ; 1/5 ; c.-109C>T ; . ; . ;	5_prime_UTR_premature_start_codon_gain_variant ; AT2G18280 ; protein_coding ; 1/5 ; c.-141C>T ; . ; . ;	5_prime_UTR_variant ; AT2G18280 ; protein_coding ; 1/5 ; c.-109C>T ; . ; . ;	5_prime_UTR_variant ; AT2G18280 ; protein_coding ; 1/5 ; c.-141C>T ; . ; . ;
CP002685.1	8224779	C	T	225	hom	31	31	HA1	gene-AT2G18960	8221514	8227622	+	.	missense_variant ; AT2G18960 ; protein_coding ; 6/16 ; c.1294C>T ; p.Leu432Phe ; 1638/3548 ;	missense_variant ; AT2G18960 ; protein_coding ; 6/16 ; c.1102C>T ; p.Leu368Phe ; 2015/3925 ;	missense_variant ; AT2G18960 ; protein_coding ; 6/16 ; c.1102C>T ; p.Leu368Phe ; 2163/4073 ;	upstream_gene_variant ; AT2G18970 ; protein_coding ; . ; c.-4594C>T ; . ; . ;	downstream_gene_variant ; AT2G18969 ; protein_coding ; . ; c.*4268G>A ; . ; . ;
CP002685.1	9246128	C	T	225	hom	27	27	PE11	gene-AT2G21610	9245038	9247052	-	.	missense_variant ; AT2G21610 ; protein_coding ; 3/5 ; c.515G>A ; p.Gly172Glu ; 527/1191 ;	missense_variant ; AT2G21610 ; protein_coding ; 3/5 ; c.500G>A ; p.Gly167Glu ; 500/1182 ;	upstream_gene_variant ; AT2G21595 ; protein_coding ; . ; c.-3177G>A ; . ; . ;	upstream_gene_variant ; AT2G21620 ; protein_coding ; . ; c.-2621C>T ; . ; . ;	upstream_gene_variant ; AT2G21630 ; protein_coding ; . ; c.-4218C>T ; . ; . ;
CP002685.1	9563709	C	T	225	hom	24	24	UCP5	gene-AT2G22500	9562774	9564850	-	.	missense_variant ; AT2G22500 ; protein_coding ; 1/1 ; c.764G>A ; p.Gly255Glu ; 1142/2077 ;	downstream_gene_variant ; AT2G07605 ; pseudogene ; . ; n.*3263C>T ; . ; . ;	downstream_gene_variant ; AT2G07615 ; pseudogene ; . ; n.*3086C>T ; . ; . ;	downstream_gene_variant ; AT2G22496 ; pseudogene ; . ; n.*2786C>T ; . ; . ;	downstream_gene_variant ; AT2G22496 ; n.*2823C>T ; . ; . ; . ; . ;
CP002685.1	9593186	C	T	225	hom	28	28	AT2G22590	gene-AT2G22590	9592956	9594579	+	missense_variant ; AT2G22590 ; protein_coding ; 1/1 ; c.175C>T ; p.Arg59Trp ; 231/1624 ;	missense_variant ; AT2G22590 ; protein_coding ; 1/1 ; c.175C>T ; p.Arg59Trp ; 231/1624 ;	upstream_gene_variant ; AT2G22570 ; protein_coding ; . ; c.-2340G>A ; . ; . ;	upstream_gene_variant ; AT2G07645 ; pseudogene ; . ; n.-881G>A ; . ; . ;	upstream_gene_variant ; AT2G22600 ; protein_coding ; . ; c.-3431C>T ; . ; . ;	upstream_gene_variant ; AT2G22570 ; protein_coding ; . ; c.-2340G>A ; . ; . ;
CP002685.1	17214990	taaaaaaaaaaaaaaa	tAaaaaaaaaaaaaaaa	30.4183	hom	30	30	SSL1	gene-AT2G41300	17214219	17216292	-	.	upstream_gene_variant ; AT2G41290 ; protein_coding ; . ; c.-2102_-2101insT ; . ; . ;	upstream_gene_variant ; AT2G09240 ; pseudogene ; . ; n.-1225_-1224insT ; . ; . ;	upstream_gene_variant ; AT2G09245 ; pseudogene ; . ; n.-2434_-2433insA ; . ; . ;	downstream_gene_variant ; AT2G41280 ; protein_coding ; . ; c.*4794_*4795insA ; . ; . ;	intron_variant ; AT2G41300 ; protein_coding ; 3/3 ; c.615-124_615-123insT ; . ; . ;
