# Supplementary material for: Identification of a Novel Mutation Exacerbated the PSI Photoinhibition in pgr5/pgrl1 Mutants; Caution for Overestimation of the Phenotypes in Arabidopsis pgr5-1 Mutant
Source: Cells. 2021 Oct 26;10(11):2884. doi: 10.3390/cells10112884 (PMC8616342; doi:10.3390/cells10112884)
Supplement: Supplementary file 1 [file cells-10-02884-s001.zip › Supplementary table S4_wada_etal.xlsx]

## Sheet: Sheet1
Supplementary Table S4 Diffenret alphabets indicate significant difference in the same PFD analyzed by Tuley's HSD test (p>0.05). (n = 5)
	A (CO2 assimilation rate; Figure 5A)													B (Y(II); Figure 5B)
		PFD (μmol-photons m-2 s-1)													PFD (μmol-photons m-2 s-1)
	Genotypes	8.2	26.1	54.8	110.8	200.3	434.6	709.3	903	1150.3	1447.6			Genotypes	8.2	26.1	54.8	110.8	200.3	434.6	709.3	903	1150.3	1447.6
	WT (col-0)	a	a	ab	a	ab	abc	a	a	a	a			WT (col-0)	ab	ab	ab	ab	ab	ab	ab	a	a	a
	WT (gl-1)	a	a	ab	a	a	a	a	a	a	a			WT (gl-1)	ab	ab	ab	ab	ab	ab	ab	a	a	a
	pgr5hope1	a	a	a	a	ab	ab	a	a	a	a			pgr5hope1	b	b	b	b	b	b	bc	b	b	b
	pgr5-1	a	a	b	a	b	c	b	b	b	b			pgr5-1	ab	ab	ab	ab	ab	b	c	b	b	b
	ptp1-1	a	a	ab	a	ab	bc	a	a	a	a			ptp1-1	a	a	a	a	a	a	a	a	a	a
	C (NPQ; Figure 5C)													D (Y(I); Figure 5D)
		PFD (μmol-photons m-2 s-1)													PFD (μmol-photons m-2 s-1)
	Genotypes	8.2	26.1	54.8	110.8	200.3	434.6	709.3	903	1150.3	1447.6			Genotypes	8.2	26.1	54.8	110.8	200.3	434.6	709.3	903	1150.3	1447.6
	WT (col-0)	a	ab	ab	a	a	a	a	a	a	a			WT (col-0)	a	a	a	a	a	a	a	a	a	a
	WT (gl-1)	b	b	g	b	b	ab	a	a	a	b			WT (gl-1)	a	ab	ab	ab	a	a	a	a	a	a
	pgr5hope1	ab	ab	ab	ab	ab	b	b	b	b	c			pgr5hope1	a	ab	ab	ab	ab	b	b	b	b	b
	pgr5-1	a	a	ab	a	a	b	b	b	b	c			pgr5-1	a	b	b	b	b	b	b	b	b	b
	ptp1-1	a	a	a	a	a	ab	a	a	a	ab			ptp1-1	a	ab	ab	ab	ab	a	a	a	a	a
	E (Y(ND); Figure 5E)													F (Y(NA); Figure 5F)
		PFD (μmol-photons m-2 s-1)													PFD (μmol-photons m-2 s-1)
	Genotypes	8.2	26.1	54.8	110.8	200.3	434.6	709.3	903	1150.3	1447.6			Genotypes	8.2	26.1	54.8	110.8	200.3	434.6	709.3	903	1150.3	1447.6
	WT (col-0)	a	a	ab	a	ab	a	a	a	a	a			WT (col-0)	b	b	b	c	b	b	c	c	c	d
	WT (gl-1)	abc	a	a	a	a	a	a	a	a	a			WT (gl-1)	ab	ab	ab	bc	b	b	c	c	c	c
	pgr5hope1	bc	a	b	a	b	b	b	b	b	b			pgr5hope1	ab	ab	ab	ab	a	a	b	b	b	b
	pgr5-1	c	a	ab	a	ab	b	b	b	b	b			pgr5-1	a	a	a	a	a	a	a	a	a	a
	ptp1-1	ab	a	ab	a	ab	a	a	a	a	a			ptp1-1	ab	ab	ab	abc	b	b	c	c	c	cd
